# Supplementary material for: iTRAQ-based proteomic analysis reveals key proteins affecting muscle growth and lipid deposition in pigs
Source: PubMed Central journal article supplement (PMC5402282; doi:10.1038/srep46717), 2017-04-24
Supplement: srep46717-s1.pdf [file srep46717-s1.pdf]

## Supplementary Information

### **iTRAQ-based proteomic analysis reveals key proteins affecting muscle growth and lipid deposition in pig**

Zhixiu Wang<sup>1+</sup>, Peng Shang<sup>1+, 2</sup>, Qinggang Li<sup>3</sup>, Liyuan Wang<sup>1</sup>, Yangzom Chamba<sup>2</sup>, Bo Zhang<sup>1</sup>, Hao Zhang<sup>1\*</sup>, Changxin Wu<sup>1</sup>

*1 National Engineering Laboratory for Animal Breeding, China Agricultural University, No.*

*2 Yuanmingyuan West Road, Beijing 100193, China*

*2 College of Animal Science, Tibet Agriculture and Animal Husbandry University, Linzhi, 860000, China*

*3 Institute of Animal Sciences and Veterinary Medicine, Anhui Academy of Agricultural Sciences, Hefei 230031, China*

\* Corresponding author

Email: [zhanghao827@163.com](mailto:zhanghao827@163.com) (HZ)

<sup>+</sup> These authors contributed equally to this work.

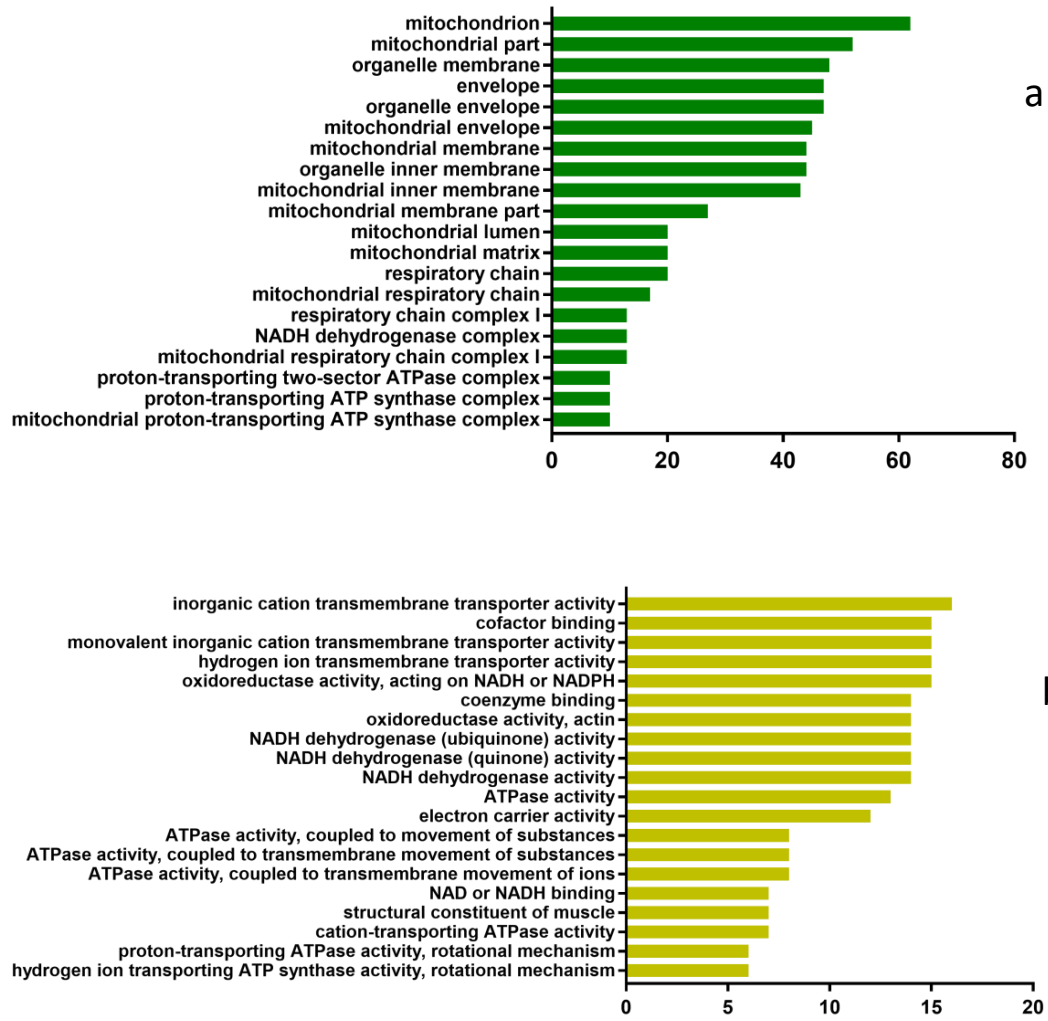

**Supplementary figure S1. Top terms of cellular component and molecular function of up-regulated DEPs. Panel (a) shows the top terms of cellular component. Panel (b) shows the top terms of molecular function.**

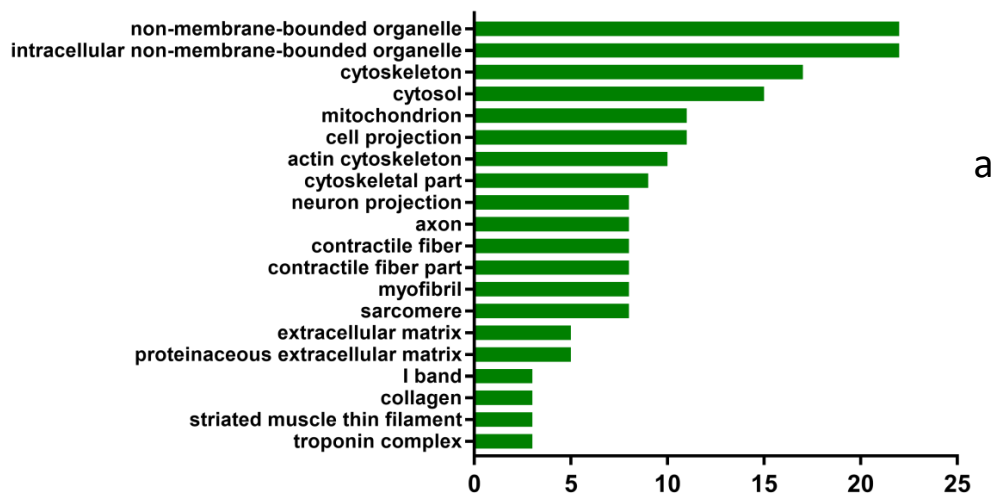

a

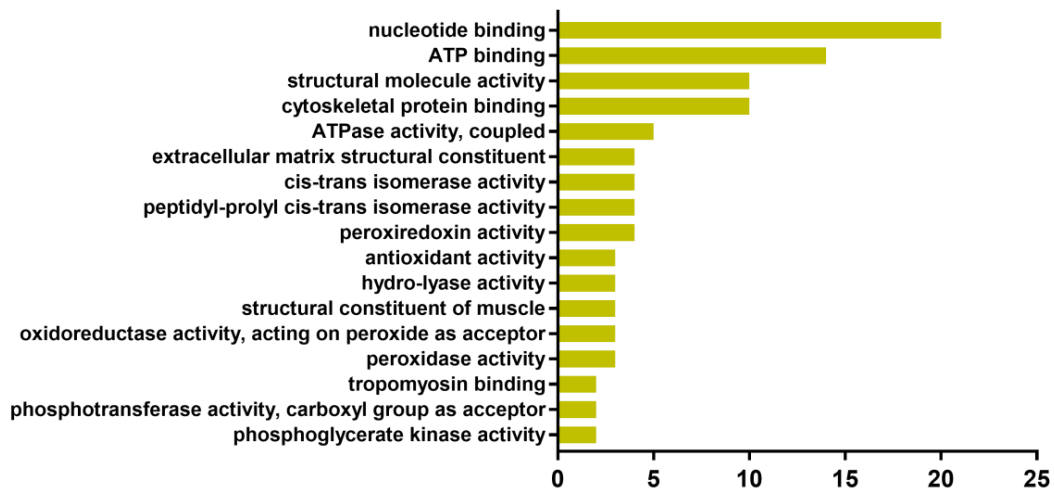

b

**Figure S2. Top terms of cellular component and molecular function of down-regulated DEPs. Panel (a) shows the top terms of cellular component. Panel (b) shows the top terms of molecular function.**

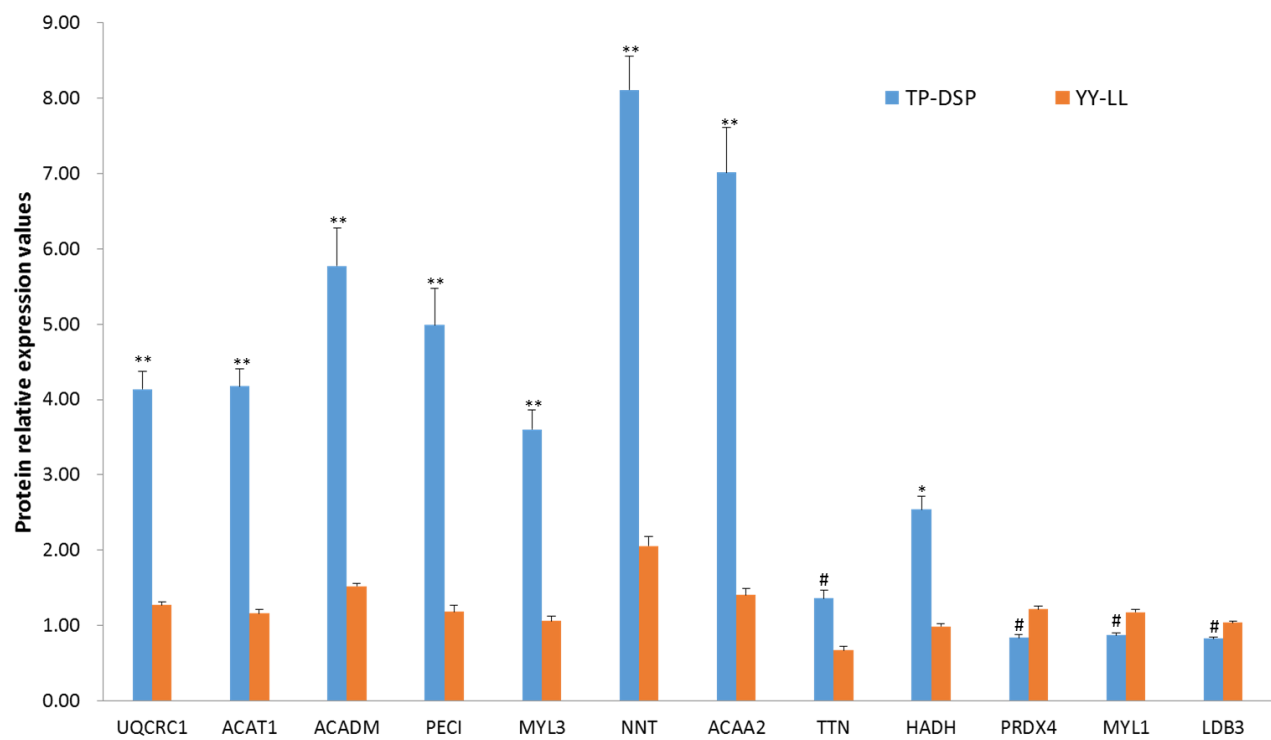

**Figure S3. Protein relative expression values in the PRM experiment. \*\* represents  $P < 0.01$ , \* represents  $P < 0.05$ , # represents  $P < 0.1$  (n=4 animals of each breed).**

**Supplementary Table S1. Identified peptides in iTRAQ (xml)**

**Supplementary Table S2. Identified proteins in iTRAQ (xml)**

**Supplementary Table S3. Differentially expressed proteins between TP-DSP and YY-LL groups (xml)**

**Supplementary Table S4. Functional annotation of up-regulated DEPs in the TP-DSP group (xml)**

**Supplementary Table S5. Functional annotation of down-regulated DEPs in the TP-DSP group (xml)**
